# Supplementary material for: Large-scale preparation of shape controlled SnO and improved capacitance for supercapacitors: from nanoclusters to square microplates
Source: Royal Society of Chemistry journal article supplement (doi:10.1039/c3nr00951c), 2013-01-01
Supplement: c3nr00951c.pdf [file c3nr00951c.pdf]

## Electronic Supplementary Information (ESI)

# Large-scale preparation of shape controlled SnO and improved capacitance for supercapacitor: From nanocluster to square microplate

Lu Wang,<sup>a,b</sup> Hongmei Ji,<sup>a</sup> Feng Zhu,<sup>a</sup> Zhi Chen,<sup>a</sup> Yang Yang,<sup>\*a</sup> Xuefan Jiang,<sup>a</sup> João Pinto,<sup>c</sup>  
Gang Yang<sup>\*a,c</sup>

<sup>a</sup> Jiangsu Laboratory of Advanced Functional Material, Changshu Institute of Technology,  
Changshu 215500, China

<sup>b</sup> School of Material Science and Engineering, Jiangsu University of Science and  
Technology, Zhenjiang 212003, China

<sup>c</sup> Department of Physics & I3N, University of Aveiro, Campus Universitário de Santiago,  
Portugal

\* Corresponding Authors. E-mail: gyang@cslg.edu.cn

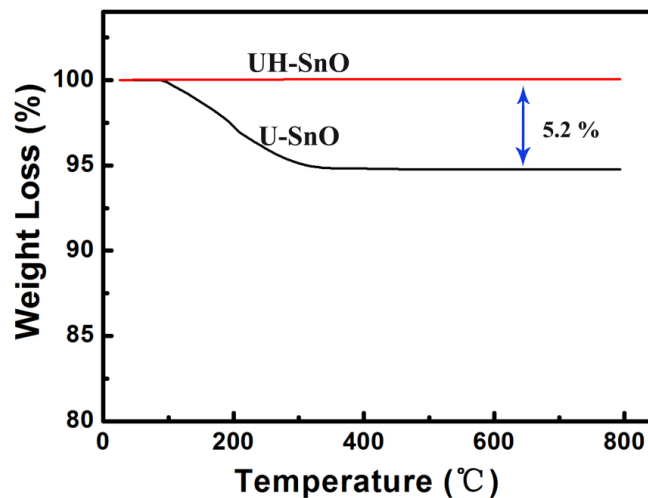

**Fig. S1** TGA curves of U-SnO and UH-SnO.

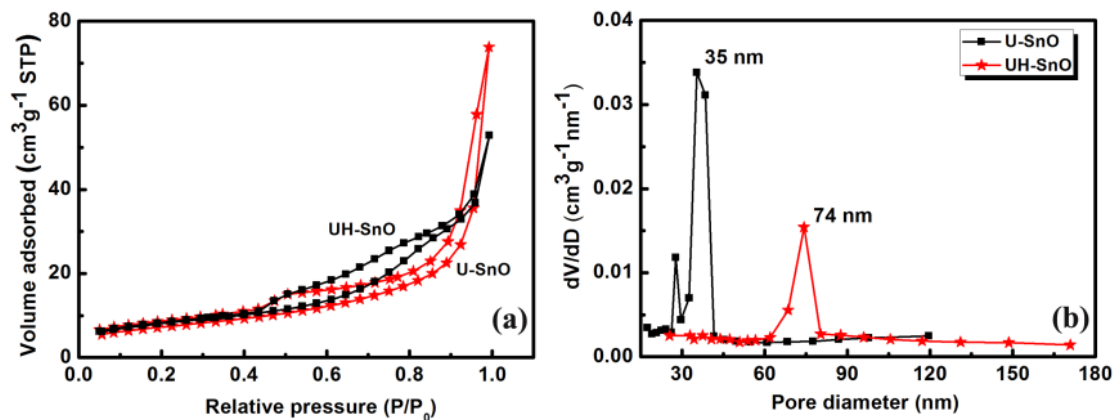

**Fig. S2** (a) Nitrogen adsorption and desorption isotherms at 77 K and (b) their corresponding pore-size distribution curve of U-SnO and UH-SnO.

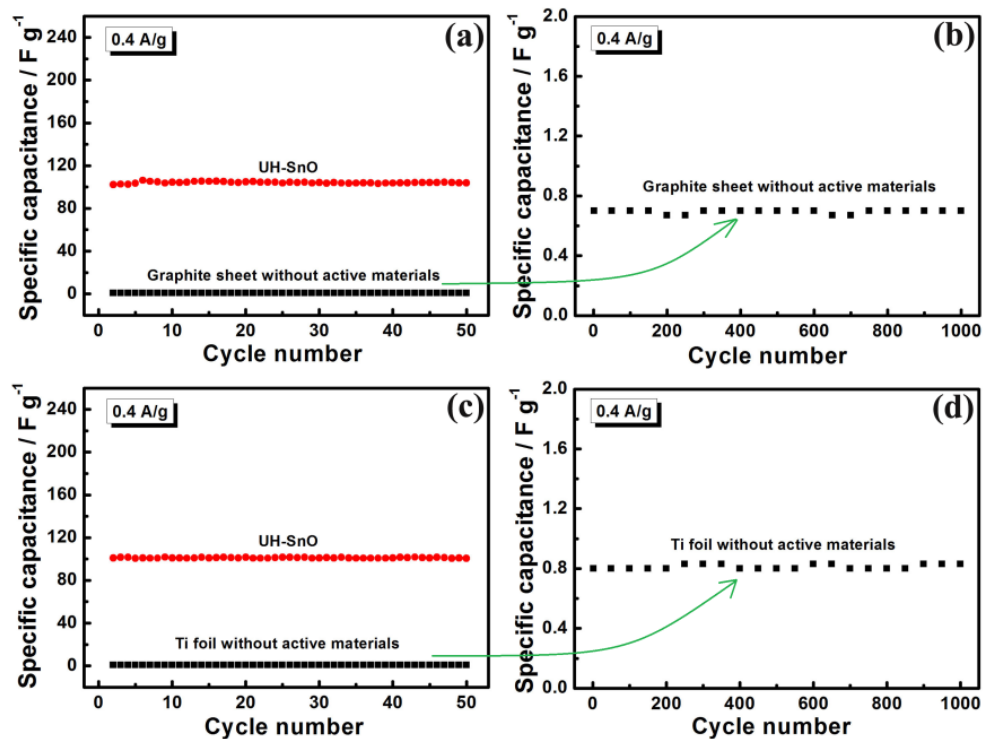

**Fig. S3** (a,c) Cycle life of UH-SnO, the pure substrate of graphite sheet and Ti foil at 0.4 A g<sup>-1</sup> with the voltage range from -0.3 to 1.2 V, (b,d) the long cycle performance of graphite sheet and Ti foil.
